# Supplementary material for: Searching for an Optimal Hexagonal Shaped Enumeration Unit Size for Effective Spatial Pattern Recognition in Choropleth Maps
Source: MDPI journal article supplement (doi:10.3390/ijgi10090576), 2021-08-25
Supplement: s1 [file s1]

Figure S1. Map used in the empirical study.

T1 Order/rank

T2 Distinguish/exclude

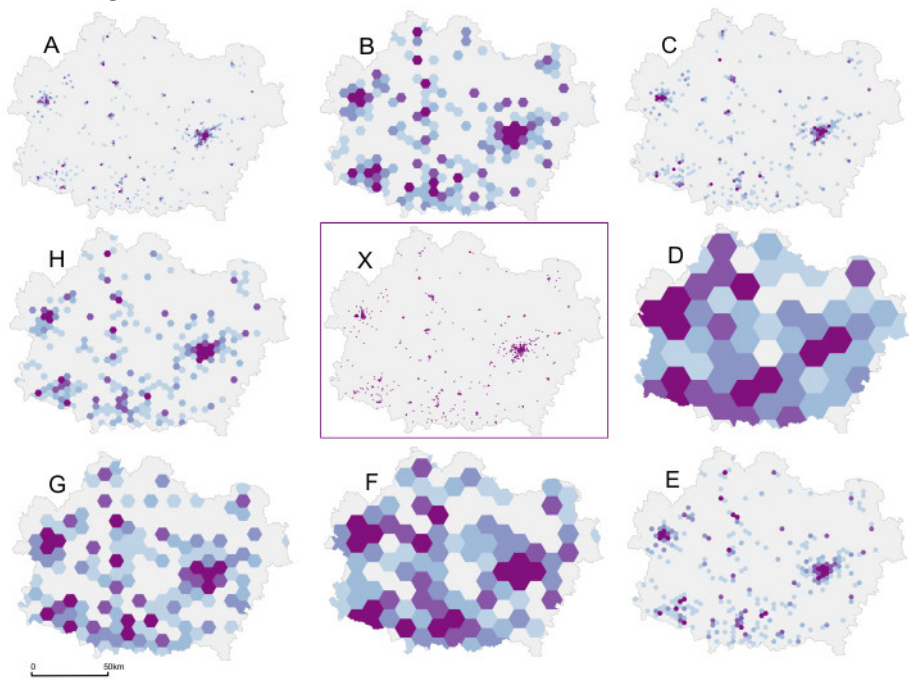

X. Symbol map, A. 26 pixels, C. 52 pixels, E. 104 pixels, H. 208 pixels, B. 416 pixels, G. 832 pixels, F. 1664 pixels, D. 3328 pixels.

T3 & T4 Compare/interpret

T5 Identify/draw

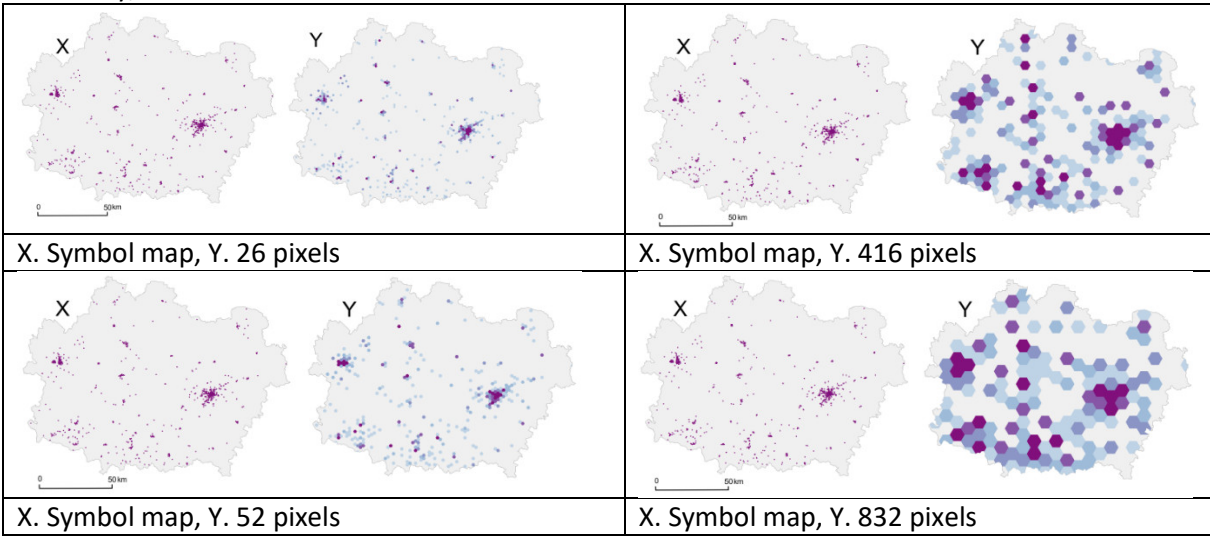

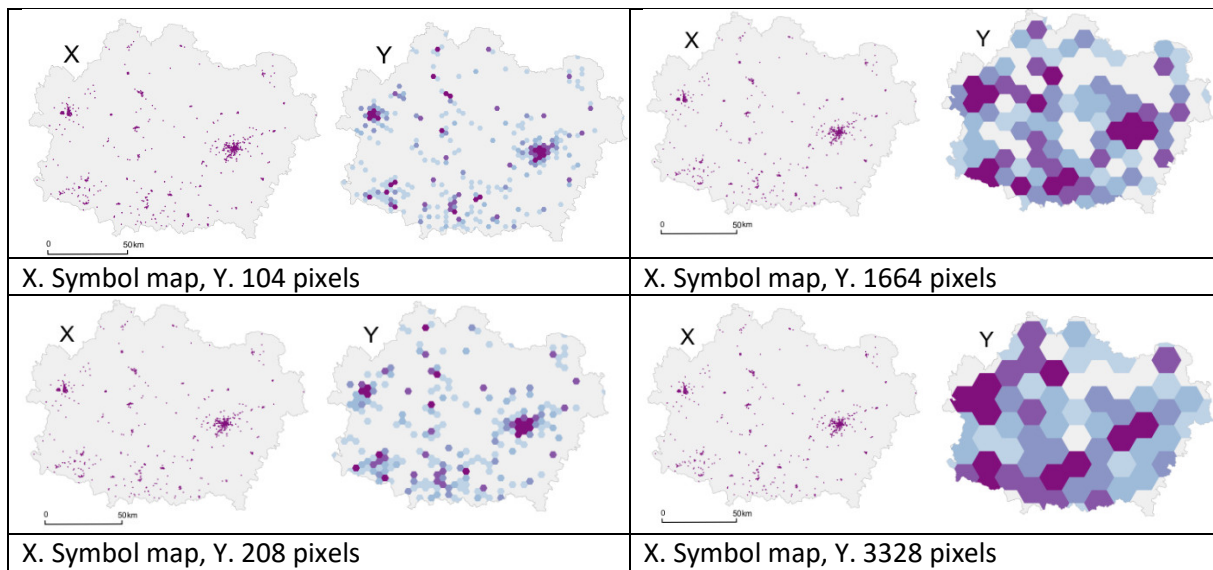

### T6 Identify/draw

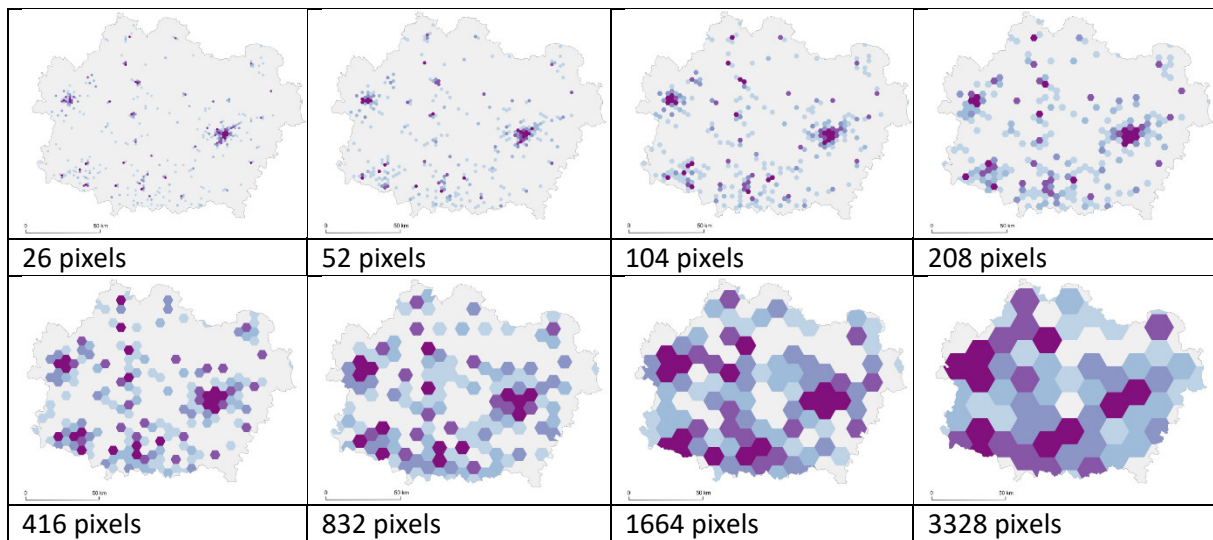

### T7 Select

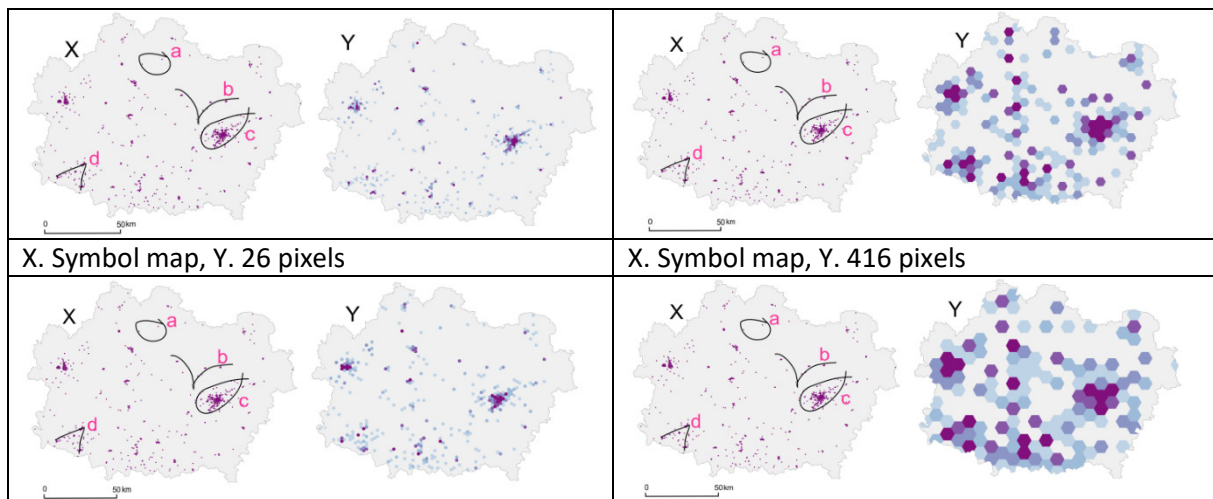

|                                                                                                                       |                                                                                                                         |
|-----------------------------------------------------------------------------------------------------------------------|-------------------------------------------------------------------------------------------------------------------------|
| <p>X. Symbol map, Y. 52 pixels</p> 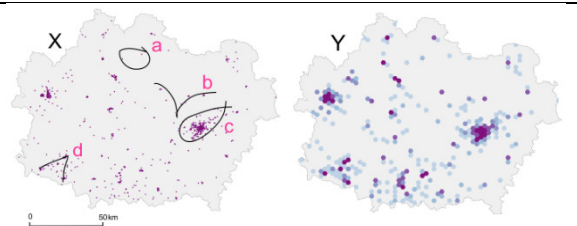  | <p>X. Symbol map, Y. 832 pixels</p>   |
| <p>X. Symbol map, Y. 104 pixels</p>  | <p>X. Symbol map, Y. 1664 pixels</p>  |
| <p>X. Symbol map, Y. 208 pixels</p>                                                                                   | <p>X. Symbol map, Y. 3328 pixels</p>                                                                                    |
